# Supplementary material
Source: PubMed Central journal article supplement (PMC1637560)
Supplement: pnas_0603850103_4.pdf [file pnas_0603850103_4.pdf]

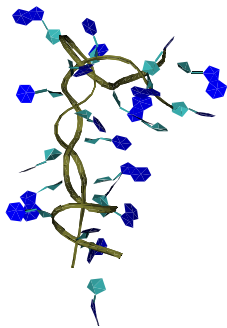

(a) Overtwisting with low tension

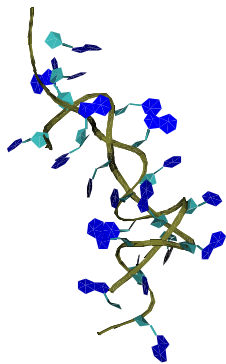

(b) Overtwisting with medium tension

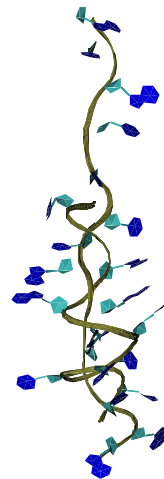

(c) Undertwisting with low tension

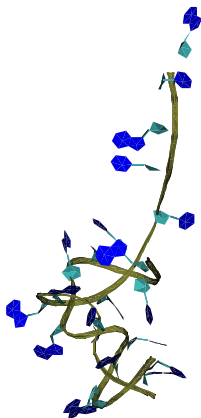

(d) Undertwisting with medium tension

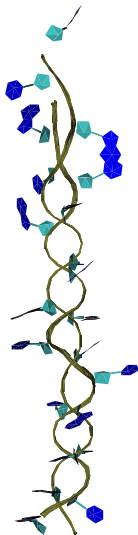

(e) Undertwisting with high tension
