# Supplementary material
Source: PubMed Central journal article supplement (PMC1637560)
Supplement: pnas_0603850103_6.pdf [file pnas_0603850103_6.pdf]

RNA Relative Extension  
Positive Driving Torque

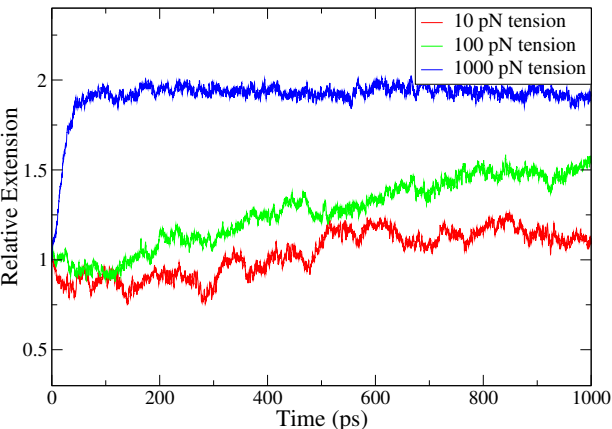

(a) Relative extension of RNA under a positive driving torque as a function of time

RNA Backbone Spacing  
Positive Driving Torque

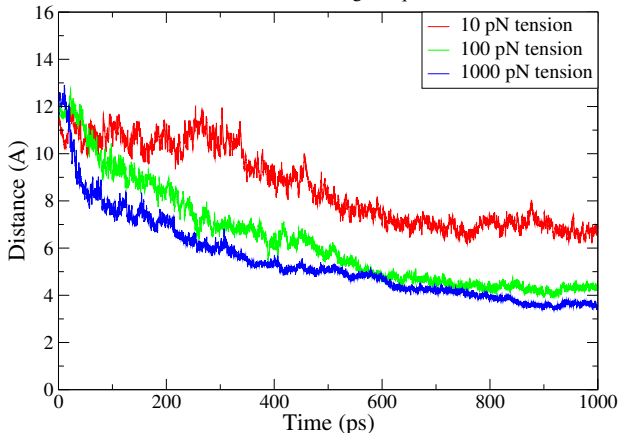

(b) Backbone spacing of RNA under a positive driving torque as a function of time

RNA Relative Extension  
Negative Driving Torque

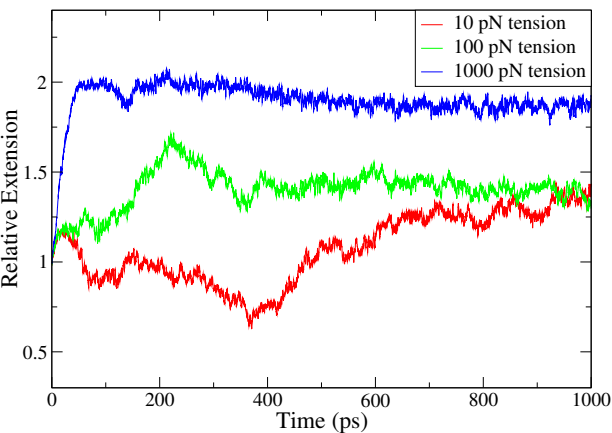

(c) Relative extension of RNA under a negative driving torque as a function of time

RNA Backbone Spacing  
Negative Driving Torque

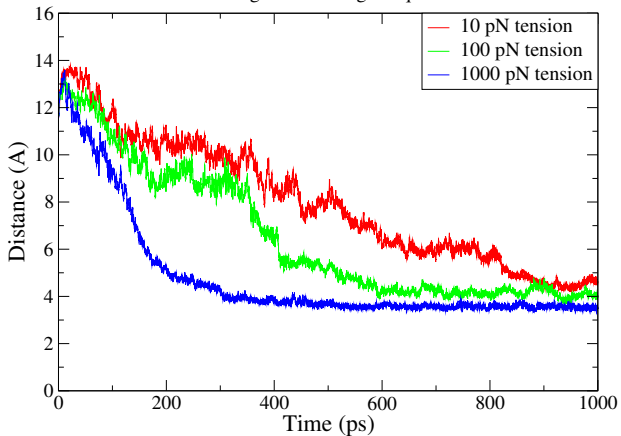

(d) Backbone spacing of RNA under a negative driving torque as a function of time
