# Supplementary material
Source: PubMed Central journal article supplement (PMC1637560)

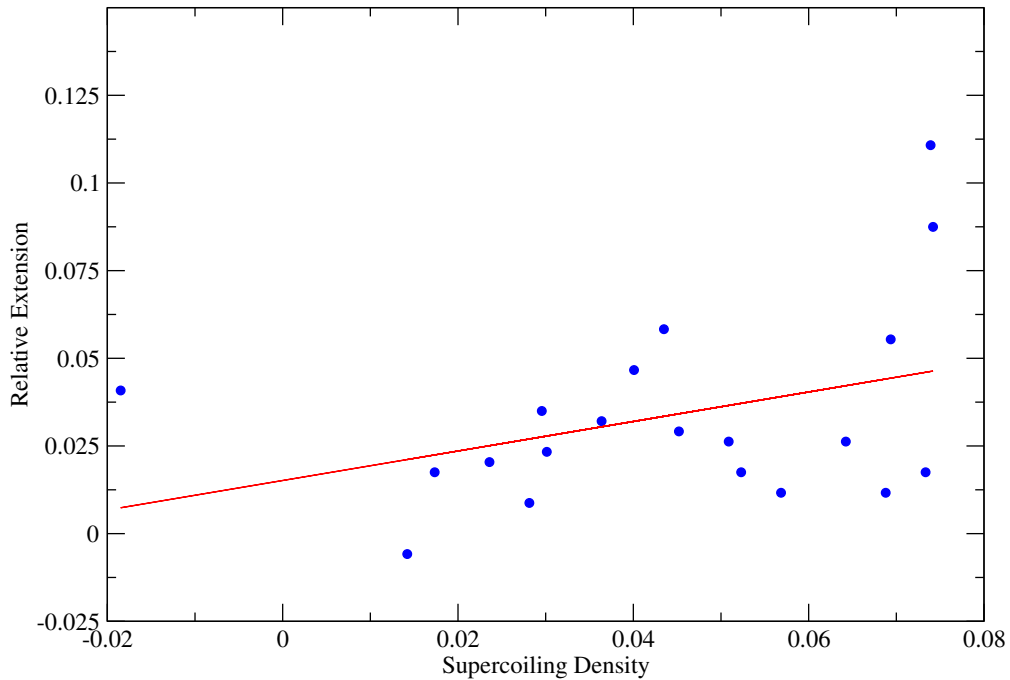

Supplement: pnas_0603850103_1.pdf [file pnas_0603850103_1.pdf]

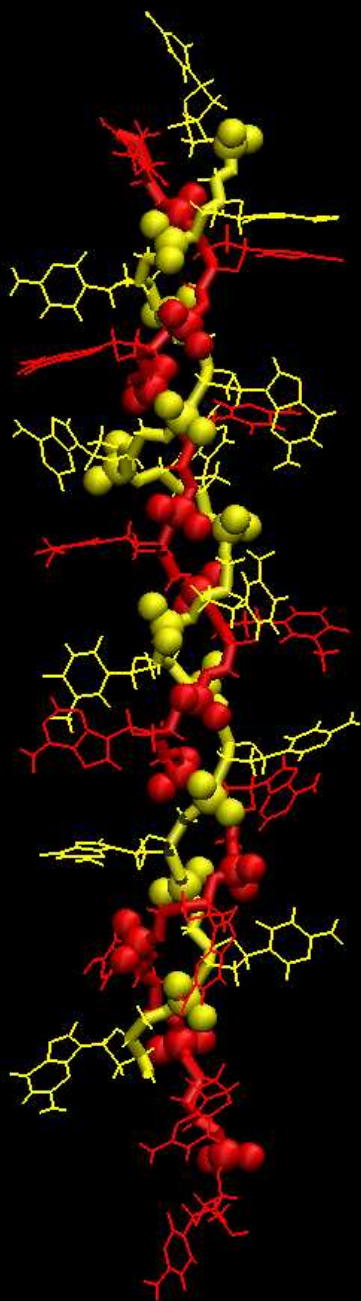

Supplement: pnas_0603850103_2.pdf [file pnas_0603850103_2.pdf]

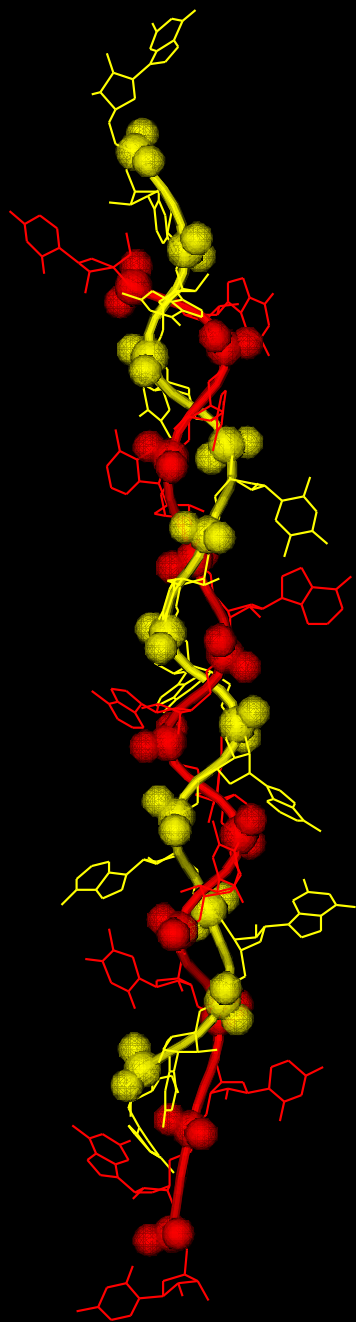

Supplement: pnas_0603850103_3.pdf [file pnas_0603850103_3.pdf]

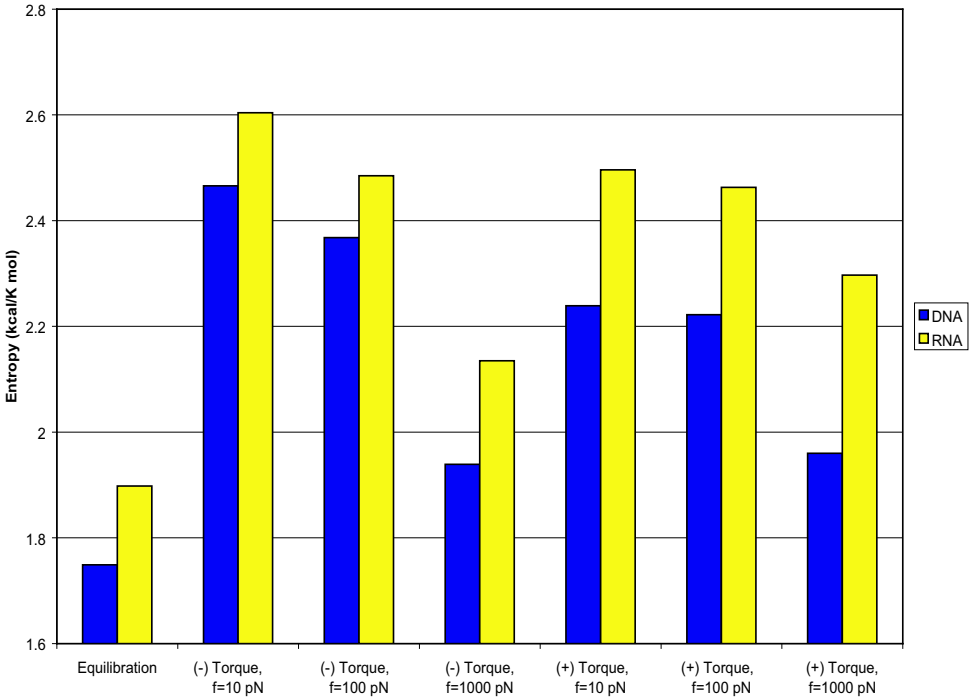

Supplement: pnas_0603850103_7.pdf [file pnas_0603850103_7.pdf]
